# Supplementary material for: Cost-effectiveness of Teriflunomide Compared to Interferon Beta-1b for Relapsing Multiple Sclerosis Patients in China
Source: PubMed Central journal article supplement — Clin Drug Investig. 2019 Jan 25;39(3):331–40. doi: 10.1007/s40261-019-00750-3 (PMC6400872; doi:10.1007/s40261-019-00750-3), 2019-01-25
Supplement: 40261_2019_750_MOESM1_ESM.pdf [file 40261_2019_750_MOESM1_ESM.pdf]

**JOURNAL: CLINICAL DRUG INVESTIGATION**

**SUPPLEMENTARY MATERIAL  
TO  
COST-EFFECTIVENESS OF TERIFLUNOMIDE COMPARED TO INTERFERON BETA-1b FOR  
RELAPSING MULTIPLE SCLEROSIS PATIENTS IN CHINA**

**Authors**

Yan Xu<sup>1</sup>, Ningying Mao<sup>2</sup>, Viktor Chirikov<sup>3</sup>, Fen Du<sup>4</sup>, Yu-Chen Yeh<sup>5</sup>, Li Liu<sup>6</sup>, Ruiqi Liu<sup>6</sup>, Xin Gao<sup>3</sup>

**Affiliations:**

<sup>1</sup>Peking Union Medical College Hospital, Beijing, China

<sup>2</sup>China Pharmaceutical University, Nanjing, China

<sup>3</sup>Pharmerit International, Bethesda, MD, USA

<sup>4</sup>Pharmerit (Shanghai) Company Limited, Shanghai, China

<sup>5</sup>Pharmerit International, Newton, MA, USA

<sup>6</sup>Sanofi, China, Shanghai, China

**Corresponding author:**

Viktor Chirikov, MS, PhD

4350 East West Highway, Suite 1100, Bethesda, MD 20814, USA

Phone Number: +1-240-821-9662

Email Address: vchirikov@pharmerit.com

**ORCID number:**

Fen Du: 0000-0002-4801-3316

Not available for other authors

**Funding:** This study was funded by Sanofi China. However, publication of the study results was not contingent on sponsor's approval. All authors contributed to the development of the publication and maintained control over the final content.

**Conflict of Interest:**

Viktor Chirikov, Fen Du, Yu-Chen Yeh, and Xin Gao are employees of Pharmerit International, which received funding from Sanofi China to conduct this research. Li Liu and Ruiqi Liu are employees of Sanofi China. Yan Xu and Ningying Mao report no conflict of interest.

|                                                                                                                                                                                            |          |
|--------------------------------------------------------------------------------------------------------------------------------------------------------------------------------------------|----------|
| <b>Supplementary Table 1. Resource use in relapse phase as identified using the physician survey.....</b>                                                                                  | <b>3</b> |
| <b>Supplementary Table 2. Resource use and indirect cost inputs by EDSS category as identified using the physician survey.....</b>                                                         | <b>4</b> |
| <b>Supplementary Table 3. Direct and indirect cost of managing RMS by EDSS stage .....</b>                                                                                                 | <b>5</b> |
| <b>Supplementary Table 4. Resource use for monitoring as identified in the physician survey .....</b>                                                                                      | <b>6</b> |
| <b>Supplementary Table 5. Unit costs associated with monitoring resources.....</b>                                                                                                         | <b>7</b> |
| <br>                                                                                                                                                                                       |          |
| <b>Supplementary Figure 1. Direct EDSS costs based on interpolation of point estimates for direct costs for mild, moderate, and severe MS disease - from Chinese physician survey.....</b> | <b>8</b> |

## JOURNAL: CLINICAL DRUG INVESTIGATION

Given that limited literature is available regarding treatment patterns and healthcare resource use in RMS patients in China, a KOL survey was conducted to obtain input for the models. A total of 11 KOLs in various regions of China who specialize in MS management were identified for the survey. KOLs had to meet the following inclusion criteria to participate in the survey: (1) attending neurologist or higher level (e.g., assistant director physician, director physician), (2) have at least 10 years of experience managing MS patients, and (3) currently manage more than 15 MS patients a year.

The survey covered questions on the resource use associated with RMS treatment and management during remission and relapse by disease severity based on the EDSS score, as well as resource use associated with the management of AEs.

**Supplementary Table 1. Resource use in relapse phase as identified using the physician survey**

|                                                     | Mean | SD  | 25 <sup>th</sup><br>Percentile | 75 <sup>th</sup><br>Percentile | Unit cost        | Source                                                                                                                                                                                                                                                                                                                 |
|-----------------------------------------------------|------|-----|--------------------------------|--------------------------------|------------------|------------------------------------------------------------------------------------------------------------------------------------------------------------------------------------------------------------------------------------------------------------------------------------------------------------------------|
| Methylprednisolone (IV x 9 days and oral x 30 days) | 1    |     |                                |                                | ¥2,124           | Based on physician survey input:<br><br>IV: 1000 mg x 3 days + 500 mg x 3 days + 240 mg x 3 days then switch to oral 120 mg x 30 days<br><br>Unit cost inputs derived from <a href="https://www.yaozh.com">https://www.yaozh.com</a><br><br>¥120 per 500 mg IV, ¥73 per 250 mg IV, ¥39 per 125 mg; ¥27 per 120 mg oral |
| Neurology outpatient visits                         | 1.3  | 1.1 | 0.7                            | 2.1                            | ¥248 per visit   | CHIRA <sup>1</sup> inflated to 2018                                                                                                                                                                                                                                                                                    |
| Emergency room visits                               | 0.4  | 0.4 | 0.1                            | 0.5                            | ¥1,054 per visit | Inflated to 2018 from Shanlian Hu et al 2014 <sup>2</sup>                                                                                                                                                                                                                                                              |
| Routine test                                        | 0.68 | 1.0 | 1.0                            | 2.5                            | ¥1,202           | Average cost for blood count, liver function test, urinalysis, and MRI from Supplementary Table 2                                                                                                                                                                                                                      |
| Hospitalization in internal neurology unit          |      |     |                                |                                |                  |                                                                                                                                                                                                                                                                                                                        |
| Hospitalization length of stay                      | 16   | 6   | 11                             | 17                             | ¥1,054 per day   | Inflated to 2018 from Shanlian Hu et al 2014 <sup>2</sup>                                                                                                                                                                                                                                                              |

**JOURNAL: CLINICAL DRUG INVESTIGATION**

**Supplementary Table 2.Resource use and indirect cost inputs by EDSS category as identified using the physician survey**

|                                                                                           | EDSS 0-3.5           | EDSS 4-6               | EDSS 7-9           | Unit cost        | Reference                                                                                                                                                                                                                   |
|-------------------------------------------------------------------------------------------|----------------------|------------------------|--------------------|------------------|-----------------------------------------------------------------------------------------------------------------------------------------------------------------------------------------------------------------------------|
|                                                                                           | Mean<br>(IQR)        | Mean<br>(IQR)          | Mean<br>(IQR)      |                  |                                                                                                                                                                                                                             |
| Neurology hospitalization visits                                                          | 0.5<br>(0-0.88)      | 1.15<br>(0-2.63)       | 1.25<br>(0-2.63)   |                  |                                                                                                                                                                                                                             |
| <i>Hospitalization length of stay</i>                                                     | 5.3<br>(0-12)        | 25.75<br>(0-37.88)     | 35.68<br>(0-64.63) | ¥1,054 per day   | Inflated to 2018 from Shanlian Hu et al 2014 <sup>2</sup>                                                                                                                                                                   |
| Neurology Outpatient visits                                                               | 6.95<br>(3-9.5)      | 7.5<br>(3.63-9.63)     | 7.75<br>(3.5-10.5) | ¥248 per visit   | CHIRA <sup>1</sup> inflated to 2018                                                                                                                                                                                         |
| Emergency room visits                                                                     | 0.43<br>(0-1)        | 1<br>(0.5-1)           | 1.57<br>(0.5-2)    | ¥1,054 per visit | Inflated to 2018 from Shanlian Hu et al 2014 <sup>2</sup>                                                                                                                                                                   |
| Routine tests                                                                             |                      |                        |                    |                  |                                                                                                                                                                                                                             |
| <i>MRI (brain)</i>                                                                        | 1.22<br>(0.5-1)      | 1.67<br>(0.5-2.5)      | 1.22<br>(0-2.5)    | ¥576             | CHIRA <sup>1</sup> inflated to 2018                                                                                                                                                                                         |
| <i>MRI (spinal cord)</i>                                                                  | 1.22<br>(0.5-1)      | 1.67<br>(0.5-2.5)      | 1.22<br>(0-2.5)    | ¥576             | CHIRA <sup>1</sup> inflated to 2018                                                                                                                                                                                         |
| <i>Blood Count</i>                                                                        | 2<br>(1.5-2)         | 2.67<br>(2-4)          | 2.11<br>(1.5-2.5)  | ¥8               | CHIRA <sup>1</sup> inflated to 2018                                                                                                                                                                                         |
| <i>Urinalysis</i>                                                                         | 2<br>(1.5-2)         | 2.33<br>(2-2.5)        | 2.00<br>(1-2.5)    | ¥9               | CHIRA <sup>1</sup> inflated to 2018                                                                                                                                                                                         |
| <i>Hepatic function</i>                                                                   | 1.39<br>(0-2)        | 1.67<br>(0-2.5)        | 0.94<br>(0-2)      | ¥34              | CHIRA <sup>1</sup> inflated to 2018                                                                                                                                                                                         |
| <i>Renal function</i>                                                                     | 1.39<br>(0-2)        | 1.67<br>(0-2.5)        | 0.94<br>(0-2)      | ¥21              | CHIRA <sup>1</sup> inflated to 2018                                                                                                                                                                                         |
| <i>Cane</i>                                                                               | 1.3%<br>(0-0)        | 42.8%<br>(20-61)       | 16.3%<br>(0-36.3)  | ¥45              | Taobao-top selling <a href="http://www.taobao.com">www.taobao.com</a>                                                                                                                                                       |
| <i>Wheelchair</i>                                                                         | 0%<br>(0-0)          | 4.4%<br>(0-6)          | 66.9%<br>(57.5-80) | ¥345             | Taobao-top selling <a href="http://www.taobao.com">www.taobao.com</a>                                                                                                                                                       |
| <i>Loss of productivity</i>                                                               |                      |                        |                    |                  |                                                                                                                                                                                                                             |
| <i>% Employed</i>                                                                         | 55%                  | 20%                    | 0%                 | ¥25,974          | 2017 China Economic Annual Report: Income House and Consumption. National Bureau of Statistics of China <a href="http://www.stats.gov.cn">www.stats.gov.cn</a><br><br>Average annual salary assuming 250 work days per year |
| <i>Number of days missed from work per year for medical care (including hospital LOS)</i> | 9                    | 30                     | 0                  |                  |                                                                                                                                                                                                                             |
| <i>% Unemployed due to MS</i>                                                             | 20%                  | 70%                    | 90%                |                  |                                                                                                                                                                                                                             |
| <i>% Retired not due to MS</i>                                                            | 25%                  | 10%                    | 10%                |                  |                                                                                                                                                                                                                             |
| <i>Informal care</i>                                                                      |                      |                        |                    |                  |                                                                                                                                                                                                                             |
| <i>Care needed %</i>                                                                      | 14.4%<br>(10-20)     | 64.4%<br>(64-71)       | 90%<br>(80-100)    | ¥200             | Cost of social workers visit per day <sup>3</sup>                                                                                                                                                                           |
| <i>Days</i>                                                                               | 85.8<br>(26.4-131.2) | 255.7<br>(198.5-317.1) | 347.1<br>(345-365) |                  |                                                                                                                                                                                                                             |

## JOURNAL: CLINICAL DRUG INVESTIGATION

**Supplementary Table 3. Direct and indirect cost of managing RMS by EDSS stage**

|                                 |      | Mean (Interquartile range) RMS management cost by EDSS score |                 |                  |                  |                  |                   |                   |                   |                   |                   |
|---------------------------------|------|--------------------------------------------------------------|-----------------|------------------|------------------|------------------|-------------------|-------------------|-------------------|-------------------|-------------------|
|                                 |      | 0                                                            | 1               | 2                | 3                | 4                | 5                 | 6                 | 7                 | 8                 | 9                 |
| Direct medical cost             | Mean | ¥0                                                           | ¥2,019          | ¥9,736           | ¥17,453          | ¥25,169          | ¥32,886           | ¥39,187           | ¥45,015           | ¥50,844           | ¥56,672           |
|                                 | IQR  | (¥0-¥0)                                                      | (¥1,253-¥2,263) | (¥1,440-¥27,264) | (¥1,627-¥52,265) | (¥1,814-¥77,266) | (¥2,001-¥102,267) | (¥1,930-¥129,152) | (¥1,773-¥156,665) | (¥1,616-¥184,178) | (¥1,459-¥211,691) |
| Loss of productivity            | Mean | ¥457                                                         | ¥3,950          | ¥7,443           | ¥10,936          | ¥14,429          | ¥17,922           | ¥20,044           | ¥21,710           | ¥23,377           | ¥25,043           |
| Informal care cost              | Mean | ¥0                                                           | ¥0              | ¥6,533           | ¥14,656          | ¥22,780          | ¥30,903           | ¥40,992           | ¥51,735           | ¥62,478           | ¥73,221           |
| <b>Cost of managing relapse</b> |      |                                                              |                 |                  |                  |                  |                   |                   |                   |                   |                   |
| Leading to hospitalization      | Mean | ¥16,865                                                      |                 |                  |                  |                  |                   |                   |                   |                   |                   |
|                                 | IQR  | (¥11,595 - ¥17,919)                                          |                 |                  |                  |                  |                   |                   |                   |                   |                   |
| Not leading to hospitalization  | Mean | ¥3,685                                                       |                 |                  |                  |                  |                   |                   |                   |                   |                   |
|                                 | IQR  | (¥2,643 - ¥5,006)                                            |                 |                  |                  |                  |                   |                   |                   |                   |                   |

RMS: Relapsing Multiple Sclerosis; EDSS: Expanded Disability Status Scale;

Note: In this table, unit cost in China was based on the China Health Insurance Research Association (CHIRA) database, resource use estimates were obtained from the Chinese key opinion leaders survey.

Direct medical care costs include: inpatient admissions, day admissions, consultations with specialists (neurologist or general practitioner), investigations/tests (MRI [brain], MRI [spine], blood and various tests)

Loss of productivity: short-term absence and reduced working time/income, early retirement

Informal care costs: social workers visits

**JOURNAL: CLINICAL DRUG INVESTIGATION**

Monitoring costs were based on resource consumption (in the first year and subsequent years that patients receive treatment) and unit costs for resources. As teriflunomide was not approved in China at the time when the KOL survey was conducted, resource use was initially obtained from the Chinese KOLs for interferon beta-1b but then estimated and validated by KOLs for teriflunomide using teriflunomide’s Chinese package insert. Unit costs associated with the monitoring resources are based on published sources in China (*Supplementary Table 3* and *Supplementary Table 4*)

**Supplementary Table 4. Resource Use for Monitoring as identified in the physician survey**

| Treatment                  | Monitoring Requirements | Number of Laboratory Tests / Visits |                                     | Source                                                                                              |
|----------------------------|-------------------------|-------------------------------------|-------------------------------------|-----------------------------------------------------------------------------------------------------|
|                            |                         | First Year of Treatment             | Subsequent Years While on Treatment |                                                                                                     |
| Teriflunomide 14 mg        | Office visit            | 5                                   | 3.5                                 | Assume the same as Interferon beta-1b                                                               |
|                            | Full blood count        | 4.5                                 | 3.3                                 | Assume the same as Interferon beta-1b                                                               |
|                            | Liver function test     | 7.5                                 | 3                                   | Teriflunomide Chinese PI for the first 6 months and assume the same as Interferon beta-1b afterword |
|                            | Renal function test     | 4.5                                 | 3                                   | Assume the same as Interferon beta-1b                                                               |
|                            | Urinalysis              | 4                                   | 2.8                                 | Assume the same as Interferon beta-1b                                                               |
|                            | MRI (brain)             | 2                                   | 1.5                                 | Assume the same as Interferon beta-1b                                                               |
| Interferon beta-1b 250 mcg | Office visit            | 5                                   | 3.5                                 | Chinese KOL input                                                                                   |
|                            | Full blood count        | 4.5                                 | 3.3                                 | Chinese KOL input                                                                                   |
|                            | Liver function test     | 4.5                                 | 3                                   | Chinese KOL input                                                                                   |
|                            | Renal function test     | 4.5                                 | 3                                   | Chinese KOL input                                                                                   |
|                            | Urinalysis              | 4                                   | 2.8                                 | Chinese KOL input                                                                                   |
|                            | MRI (brain)             | 2                                   | 1.5                                 | Chinese KOL input                                                                                   |

Abbreviations: MRI = magnetic resonance imaging

## JOURNAL: CLINICAL DRUG INVESTIGATION

**Supplementary Table 5. Unit Costs Associated with Monitoring Resources**

| <b>Monitoring Requirement</b>            | <b>Unit Cost (¥) 2018</b> | <b>Source</b>                       |
|------------------------------------------|---------------------------|-------------------------------------|
| Office visit (routine medical check- up) | ¥7                        | CHIRA <sup>1</sup> inflated to 2018 |
| Full blood count                         | ¥8                        | CHIRA <sup>1</sup> inflated to 2018 |
| Liver function test                      | ¥34                       | CHIRA <sup>1</sup> inflated to 2018 |
| Renal function test                      | ¥21                       | CHIRA <sup>1</sup> inflated to 2018 |
| Urinalysis with urine cell counts        | ¥9                        | CHIRA <sup>1</sup> inflated to 2018 |
| MRI scan (to detect PML)                 | ¥576                      | CHIRA <sup>1</sup> inflated to 2018 |

Abbreviations: MRI = magnetic resonance imaging; PML = progressive multifocal leukoencephalopathy

Source: Survey Report on the Use of Drugs, Medical Equipment and Treatments about patients with Basic Medical Insurance in 2016” developed by China Health Insurance Research Association

The approach to convert the three-group EDSS estimates from the survey to the individual EDSS stages required for the model is outlined below. A previous study from a US perspective<sup>4</sup> calculated the costs for each EDSS health state using linear interpolation from the values estimated from a survey of 1909 US patients using EDSS values of <4, 4-6, and >6.

A justification for using such an approach is further provided by another analysis<sup>5</sup> in which data from the Sonya Slifka database was explored and due to the absence of robust evidence on the relationship between the EDSS and the costs of care in the US, a straight line relationship was assumed between EDSS progression and the associated costs of care. The lack of a linear relationship between costs across all EDSS stages could be due to very small sample size of patients contributing in EDSS stages between 5 and 7.5. However, this non-linearity could be addressed by assuming two independently linear portions going from EDSS 0-5 and from 5-9.

After using linear interpolation on the point estimates for mild, moderate, and severe EDSS categories from the physician survey, **Supplementary Figure 1** presents medical costs per each individual EDSS state in China.

**Supplementary Figure 1. Direct EDSS costs based on interpolation of point estimates for direct costs for mild, moderate, and severe MS disease - from Chinese physician survey**

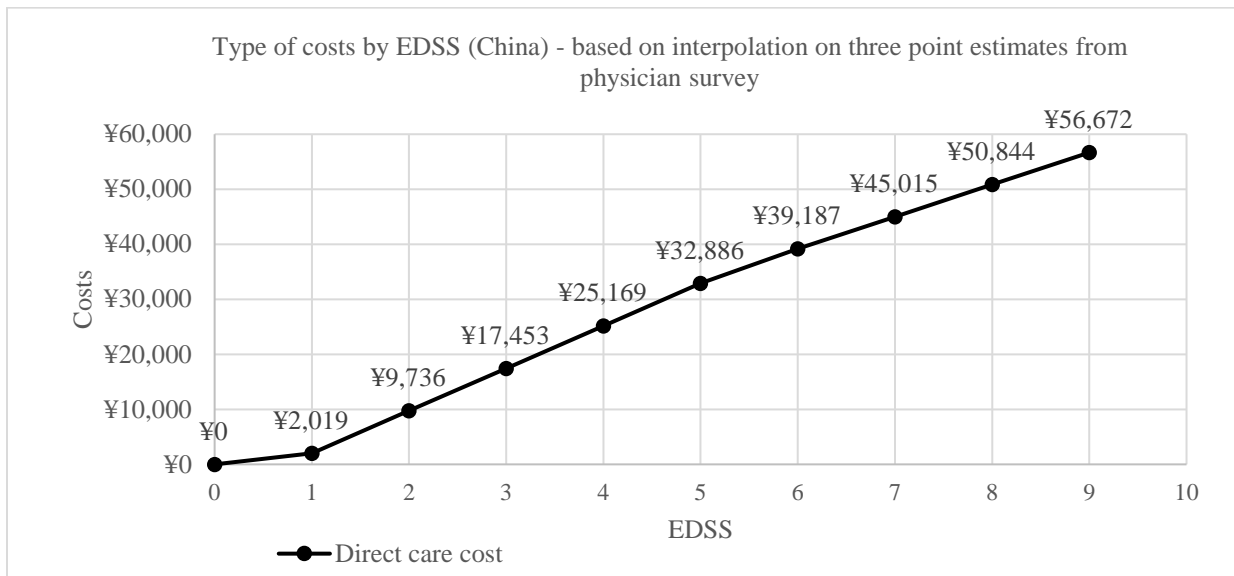



**REFERENCES**

1. Survey Report on the Use of Drugs, Medical Equipment and Treatments about patients with Basic Medical Insurance in 2016” (2016 年药品医疗器械诊疗项目利用情况调查数据报告) developed by China Health Insurance Research Association (CHIRA).
2. Hu Shanlian, Du Lixia, He Jiangjiang, Chen Wen, Shao Yiyi. Analysis of Hospitalization Expenses of Patients with Multiple Sclerosis in Shanghai [J]. Policy Translation of Pharmacoeconomics, 2014, 136-138.
3. Yan J, Ge L, Clay E, Toumi M, Milea D. Disease Management, Resource Utilisation and Associated Cost for Moderate and Severe Dementia Patients in China: Results from a Delphi Panel. Value in Health 2014;17:A768.
4. Mauskopf J, Fay M, Iyer R, Sarda S, Livingston T. Cost-effectiveness of delayed-release dimethyl fumarate for the treatment of relapsing forms of multiple sclerosis in the United States. J Med Econ 2016;19:432-42.
5. Tappenden P, McCabe C, Simpson E, Chilcott J, Nixon R, Madan J. The clinical effectiveness and cost-effectiveness of interferon-beta and glatiramer acetate in the management of relapsing/remitting and secondary-progressive multiple sclerosis. The School of Health and Related Research, The University of Sheffield 2006.
